# Supplementary material for: The Inhibition of Wnt Restrain KRASG12V-Driven Metastasis in Non-Small-Cell Lung Cancer
Source: PubMed Central journal article supplement (PMC7226522; doi:10.3390/cancers12040837), 2020-03-31
Supplement: cancers-12-00837-s001.pdf [file cancers-12-00837-s001.pdf]

# Supplementary Materials: The Inhibition of Wnt Restrain *KRAS*<sup>G12V</sup>-Driven Metastasis in Non-Small- Cell Lung Cancer

Pei-Shan Hung, Ming-Hung Huang, Yuan-Yeh Kuo and James Chih-Hsin Yang

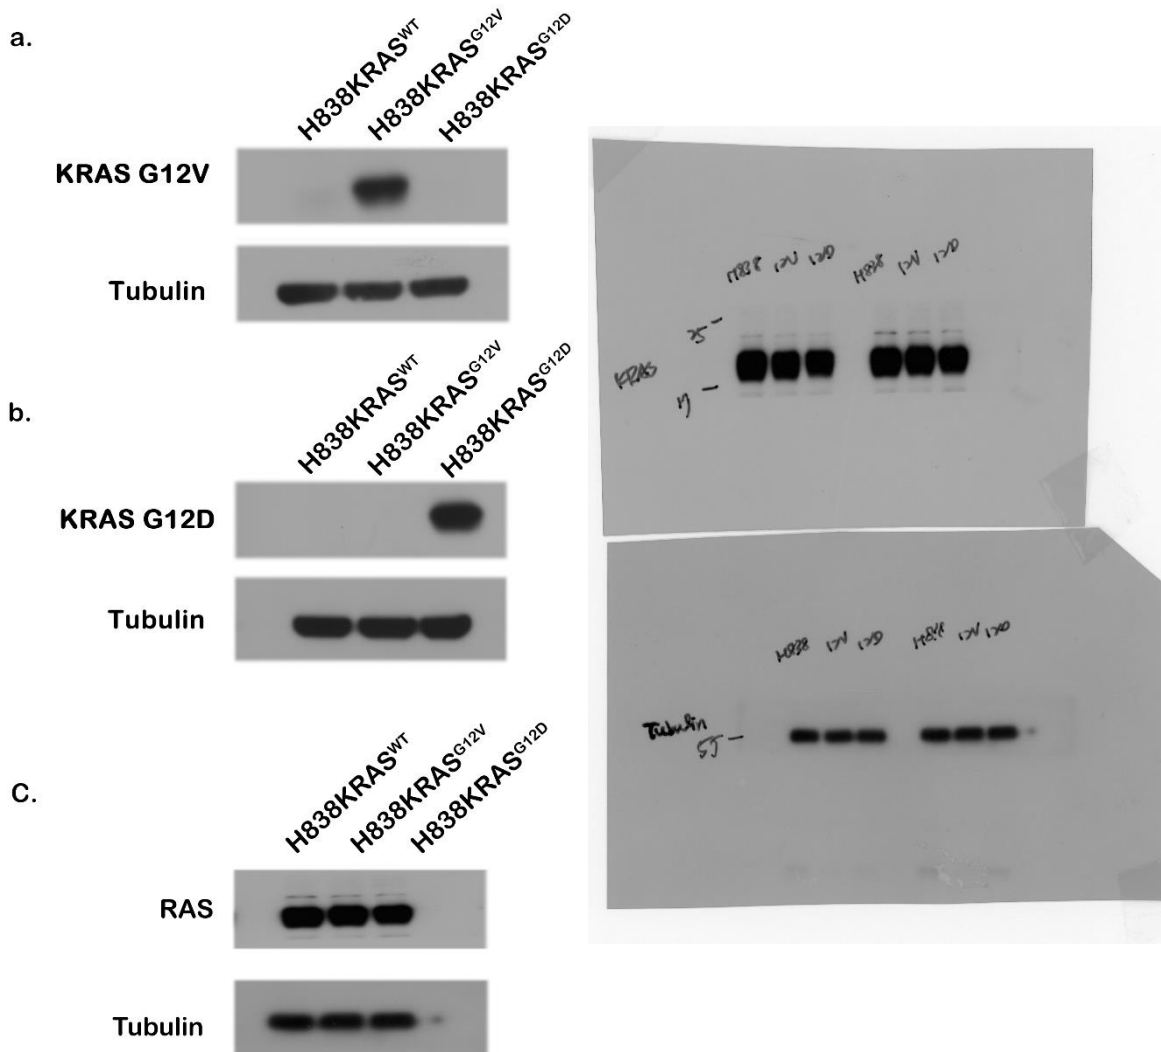

**Figure S1.** The mutation status of KRAS in H838 KRAS isogenic cells. (a) The expression of KRAS<sup>G12V</sup> in H838KRAS<sup>G12V</sup> cells. (b) The expression of KRAS<sup>G12D</sup> in H838KRAS<sup>G12D</sup> cells. (c) The western blotting of RAS expression in H838 isogenic cells.

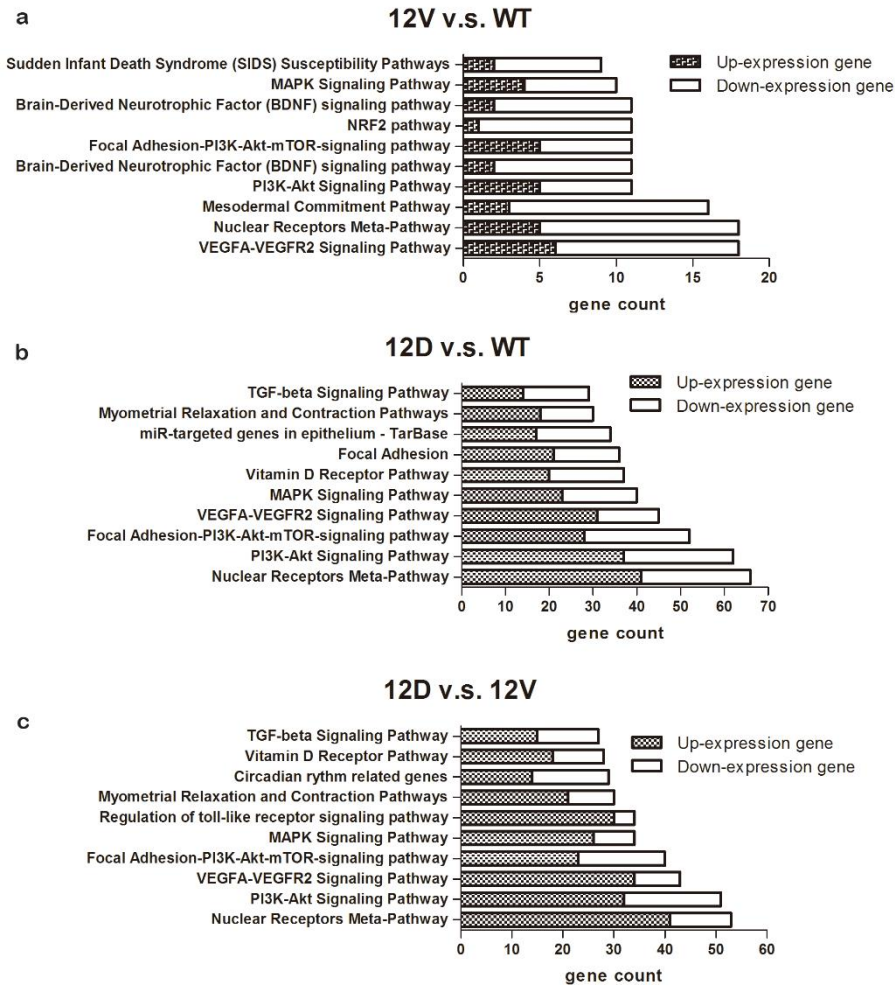

**Figure S2.** The gene ontology and pathway analysis in H838 KRAS isogenic cells. The top 10 Pathways were predicted to be associated with H838KRAS<sup>WT</sup>, H838KRAS<sup>G12V</sup>, and H838KRAS<sup>G12D</sup> on Y -axis and genes count on X -axis.

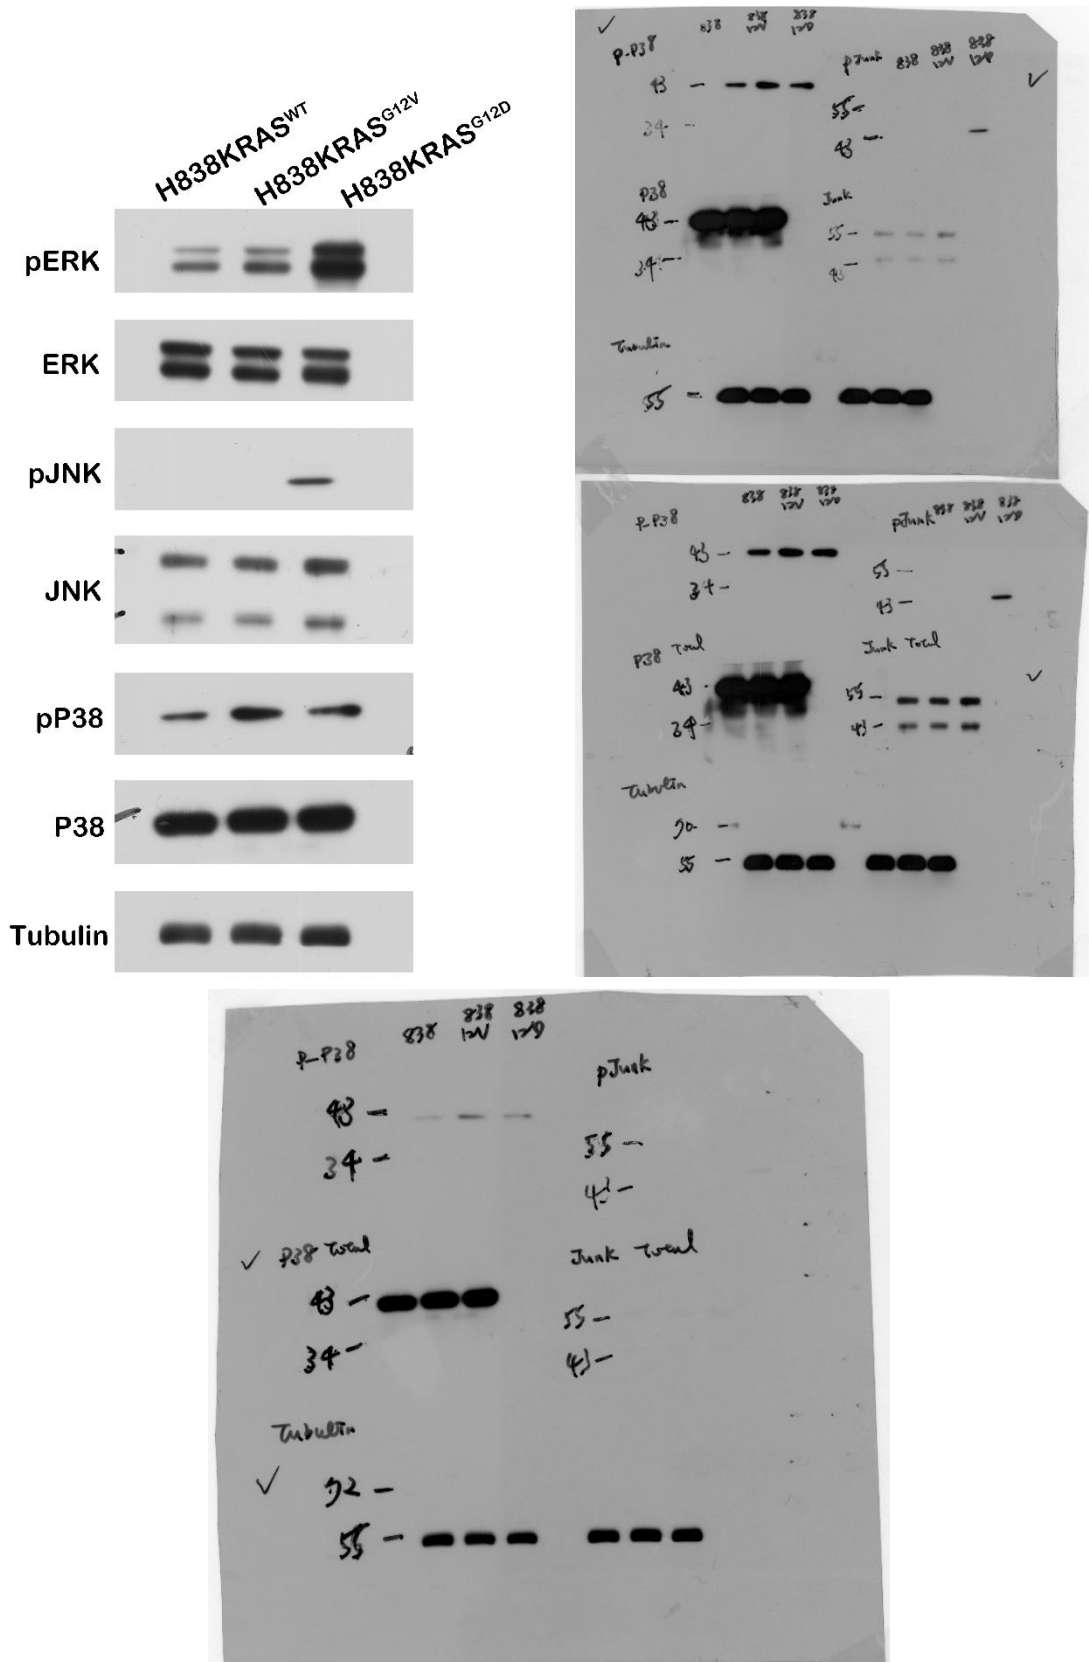

**Figure S3.** The MAPK pathway in H838 KRAS isogenic cells. Immunoblot blot were probed with ERK (phospho/Total), JNK (phospho/Total) and p38 (phospho/Total) antibody. Tubulin was used as an internal control.

**a**

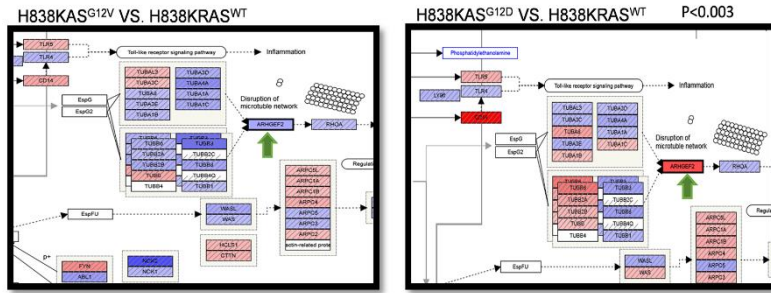

**b**

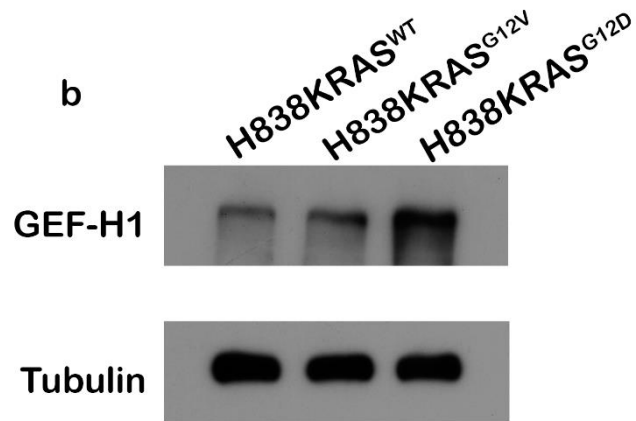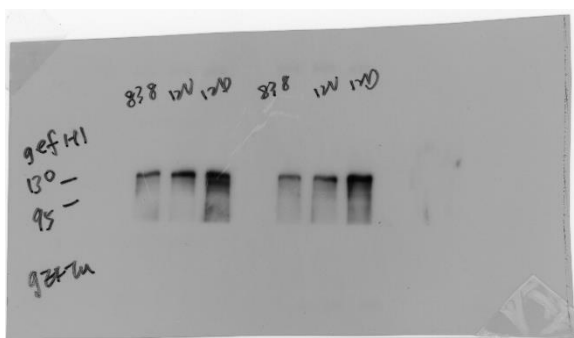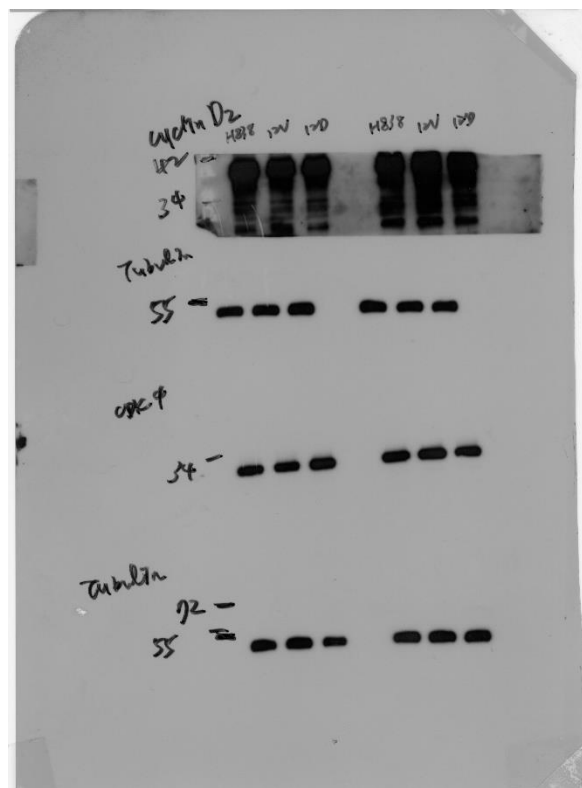

**Figure S4.** GEF-H1 was increased in H838KRAS<sup>G12D</sup> cells. (a). The analysis of Transcriptome Analysis Console (TAC) of GEF-H1 and GEF-H1 related pathway. (b). The immunoblot analysis of GEF-H1 in H838KRAS isogenic cells. Tubulin was used as an internal control.

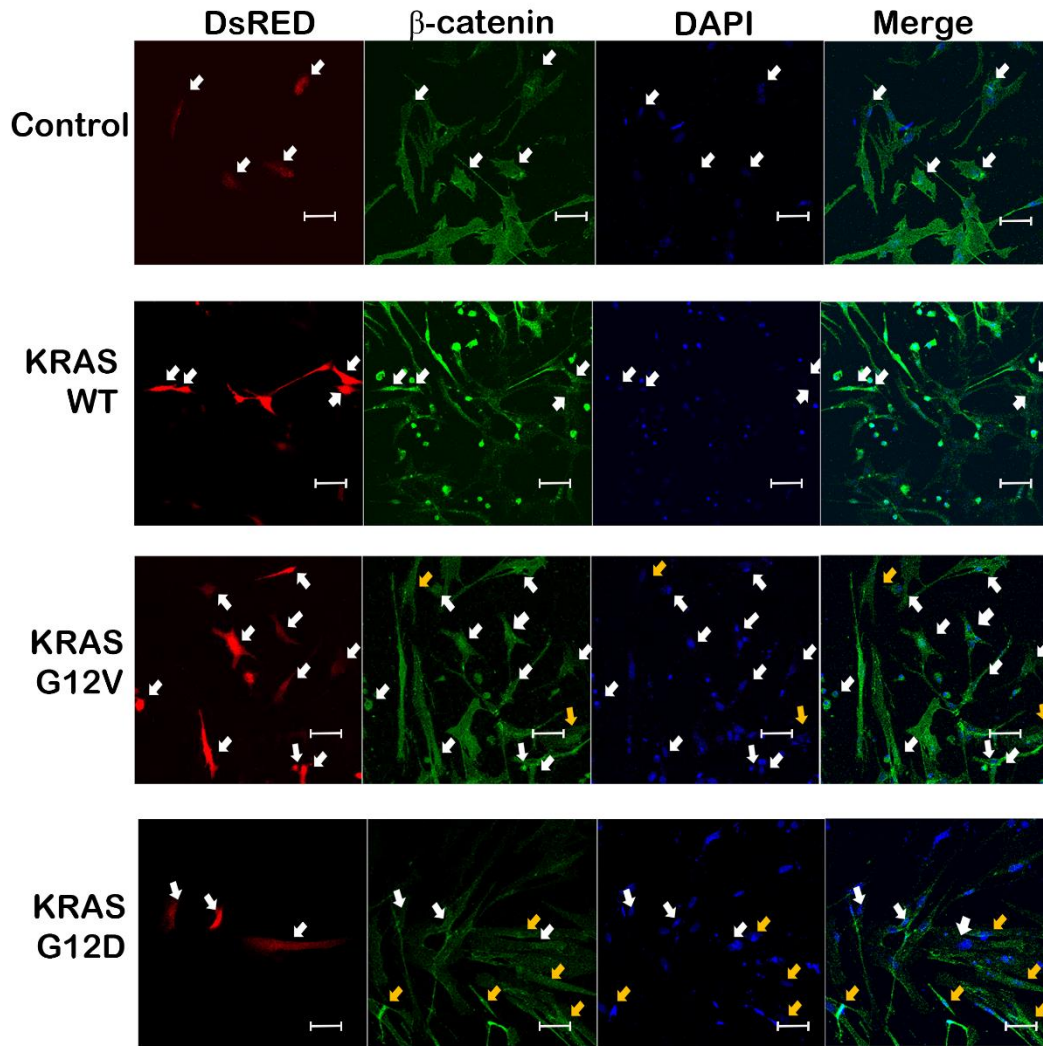

**Figure S5.** KRAS G12D inactivate the activity of WNT / $\beta$ -catenin in MRC-5 cells. KRAS G12D did not induce WNT / $\beta$ -catenin translocation into nucleus. White arrows indicate the plasmid transfected cells. Yellow arrows indicate the non-transfected cells. MRC-5 cells were transfected with DsRed-tagged KRAS WT, KRAS G12V, and KRAS G12D plasmid. IF staining after EGF stimulation.  $\beta$ -catenin is visualized with green fluorescent. Hoechst3342 is the blue nuclear stain. Immunoreactivity was captured by confocal microscopy. Scale bar 50  $\mu$ m.

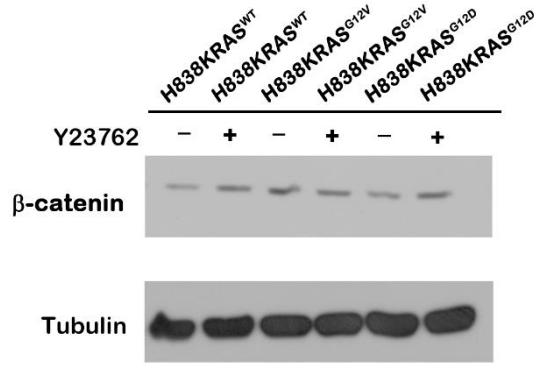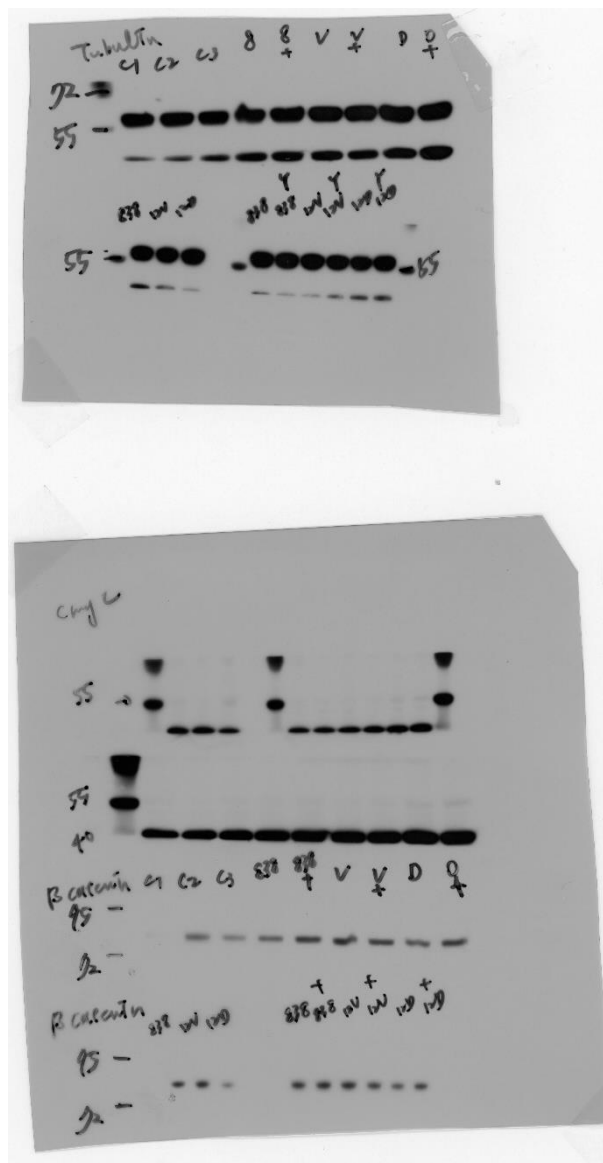

**Figure S6.** The RhoA suppress the expression of  $\beta$ -catenin in H838 KRAS isogenic cells. The western blotting of  $\beta$ -catenin in H838 KRAS isogenic cells after 30 $\mu$ M Y23762 treatment (RhoA inhibitor).

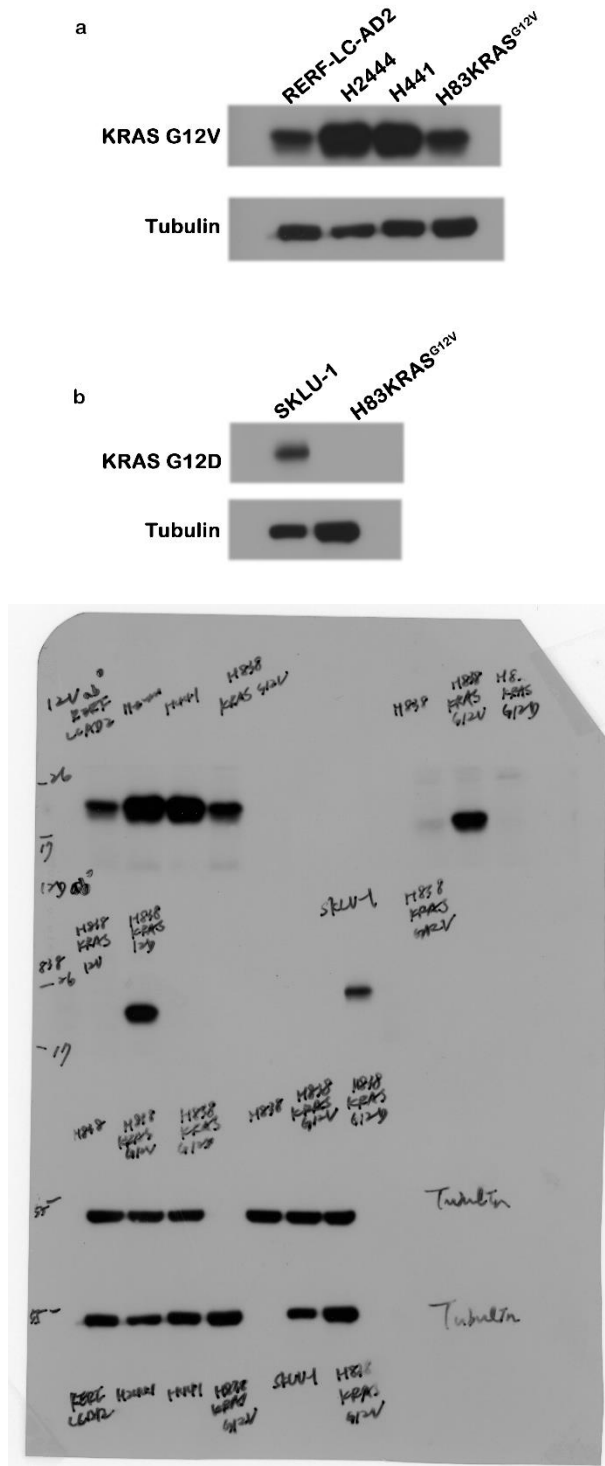

**Figure S7.** The mutation status of KRAS in KRAS-mutant NSCLC cells. (a) The expression of KRAS<sup>G12V</sup> in RERF-LC-AD2, H441, H2444, and H838KRAS<sup>G12V</sup> cells. H838 KRAS<sup>G12V</sup> cells as a positive control. (b) The expression of KRAS<sup>G12D</sup> in SKLU-1 and H838KRAS<sup>G12V</sup> cells. H838KRAS<sup>G12V</sup> cells as a negative control.

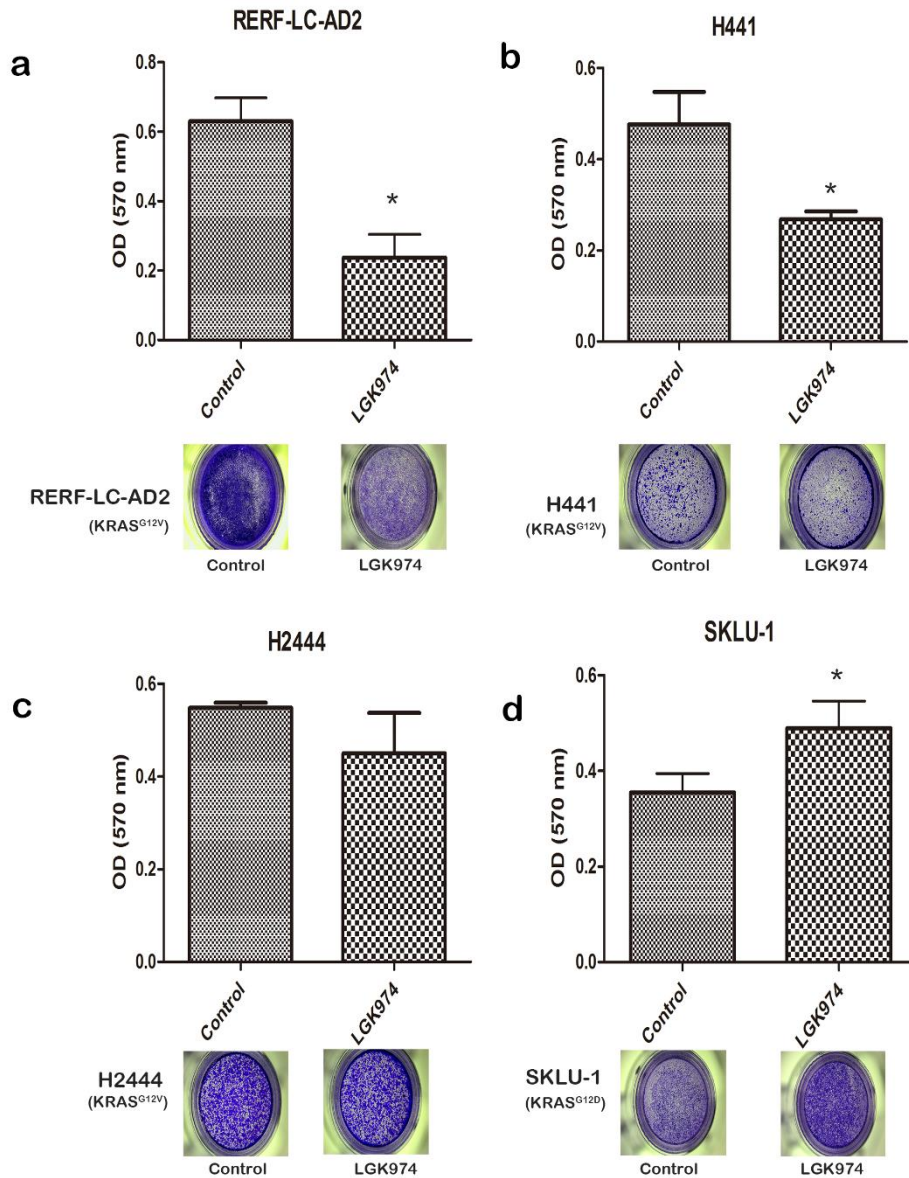

**Figure S8.** The migration ability of KRAS<sup>G12V</sup>mutant NSCLC cells were attenuated by LGK974. (a). The migration assay of RERF-LC-DA2 after 20nM LGK974 treatment. (b). The migration assay of H441 after 20nM LGK974 treatment. (c). The migration assay of H2444 after 20nM LGK974 treatment. (d). The migration assay of SK-LU-1 after 20nM LGK974 treatment. The values represent the means ± s.d. of three independent assays ( $n = 3$ ,  $*p < 0.05$ )

**Table S1.** Quantitative real-time PCR primers used in this study.

| Gene   | Product Number |
|--------|----------------|
| CDH1   | Hs01023894_m1  |
| CDH2   | Hs00983056_m1  |
| SNAI1  | Hs00195591_m1  |
| SNAI2  | Hs00161904_m1  |
| VIM    | Hs00958111_m1  |
| CTNNB1 | Hs00355049_m1  |
| GAPDH  | Hs99999905_m1  |

**Table 2.** List of antibodies used in western blotting.

| Antibody | Name Company |
|----------|--------------|
|----------|--------------|



---

|                          |                |
|--------------------------|----------------|
| $\beta$ -catenin (#8480) | Cell Signaling |
| Vimentin (#5741)         | Cell Signaling |
| Snail (#3879)            | Cell Signaling |
| Slug (#9585)             | Cell Signaling |
| Cyclin D1(GTX108624)     | GeneTex        |
| c-Myc (GTX103436)        | GeneTex        |
| Tubulin (ab12546)        | Abcam          |
| N-cadherin (ab76011)     | Abcam          |
| E-cadherin (ab40772)     | Abcam          |
| Ras (#3965)              | Cell Signaling |
| Ras G12V mutant (#14412) | Cell Signaling |
| Ras G12D mutant (#14429) | Cell Signaling |
| pP38 (#9211)             | Cell Signaling |
| P38 (#8690)              | Cell Signaling |
| pJunk (#9251)            | Cell Signaling |
| Junk (#9252)             | Cell Signaling |
| pERK (#9101)             | Cell Signaling |
| ERK (#9102)              | Cell Signaling |

---

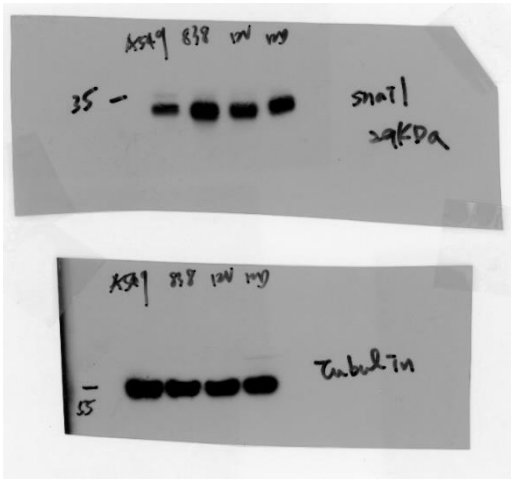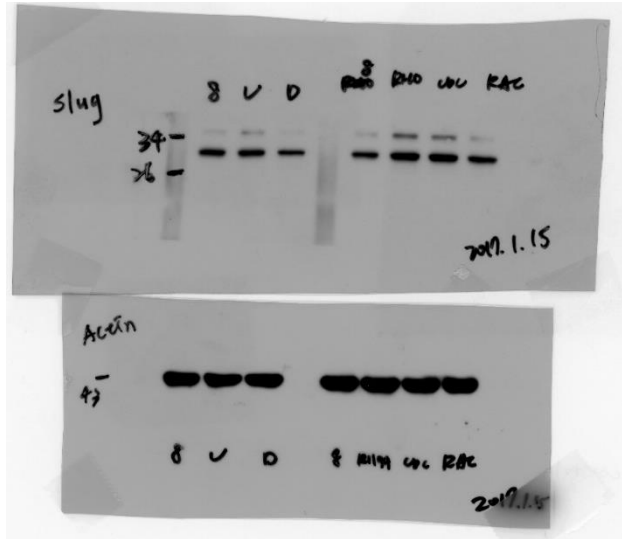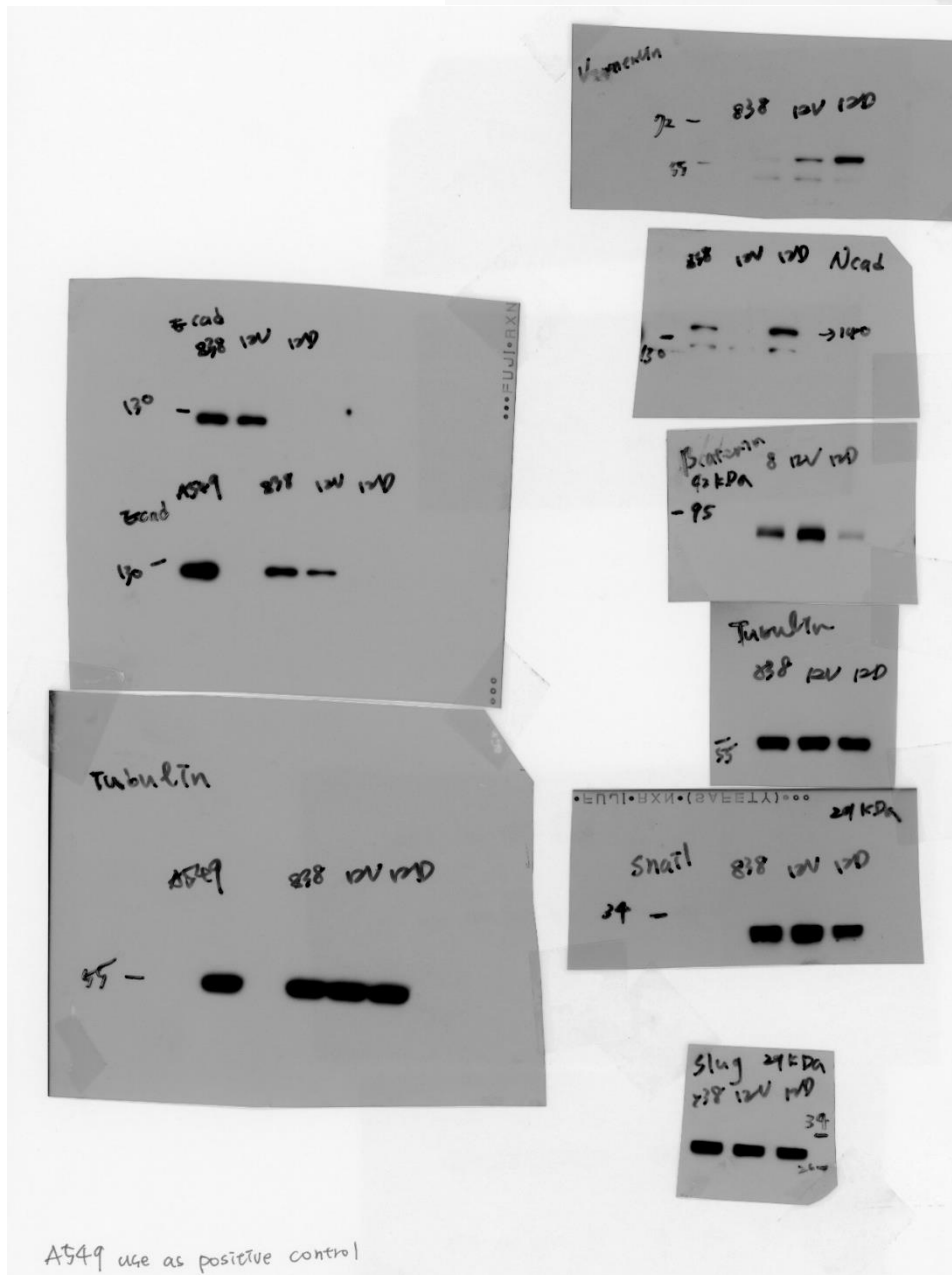

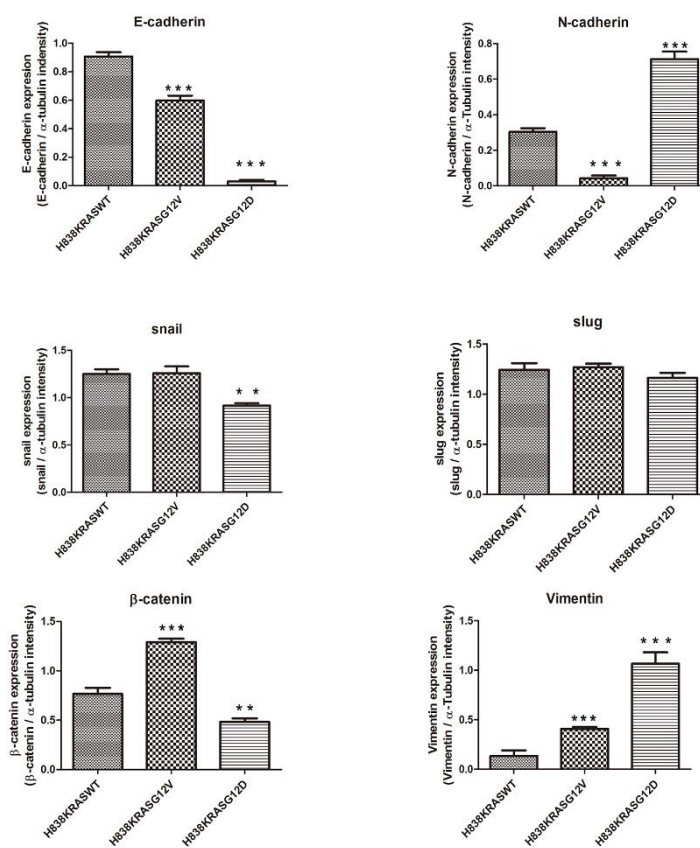

Figure S9. The uncropped blots and molecular weight markers of Figure 5.

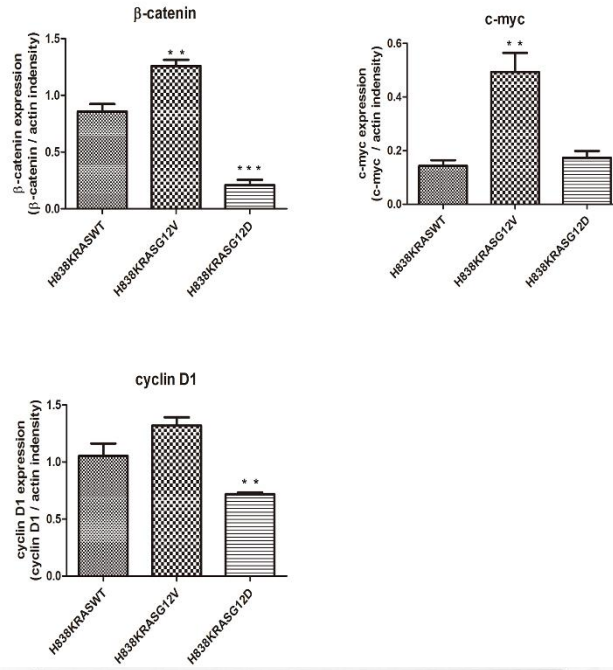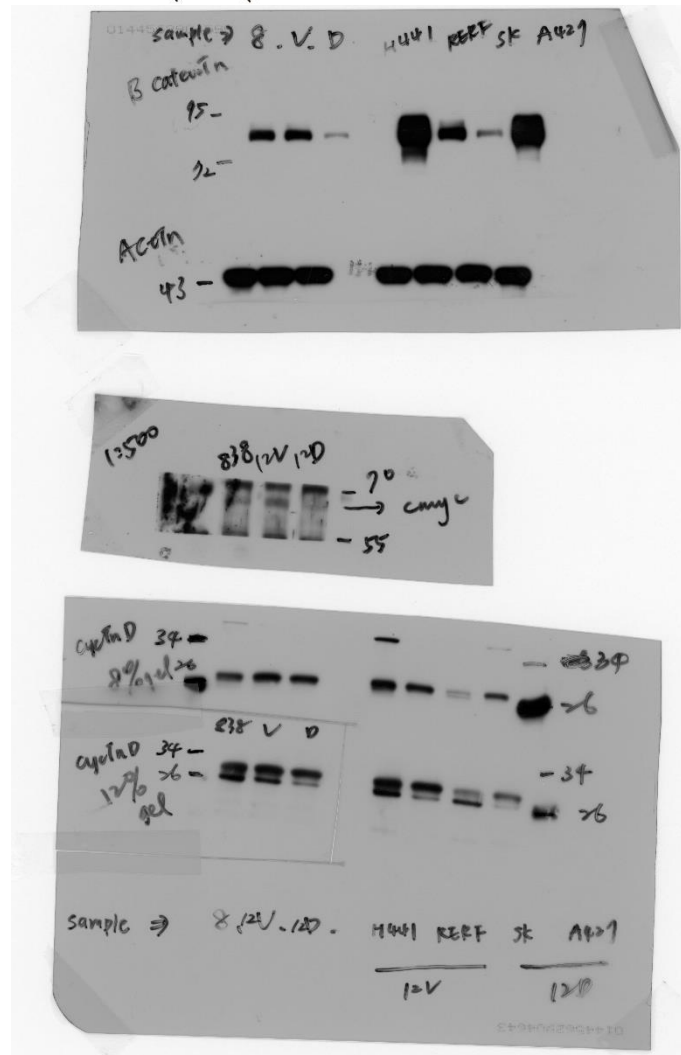

Figure S10. The uncropped blots and molecular weight markers of Figure 6.

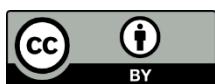

© 2020 by the authors. Licensee MDPI, Basel, Switzerland. This article is an open access article distributed under the terms and conditions of the Creative Commons Attribution (CC BY) license (<http://creativecommons.org/licenses/by/4.0/>).
